# Supplementary material for: Evaluation on the recovery of lignin from basic [Ch][Lys] systems using low-cost alcohols as anti-solvents under acid-free conditions
Source: Royal Society of Chemistry journal article supplement (doi:10.1039/d4gc03898c), 2024-01-01
Supplement: d4gc03898c1.pdf [file d4gc03898c1.pdf]

## Electronic Supplementary Information

### Evaluation on the recovery of lignin from basic [Ch][Lys] systems using low-cost alcohols as anti-solvent under acid-free condition

Yichen Liu,<sup>a</sup> Wanting Zhao,<sup>a</sup> Qizhen Luo,<sup>a</sup> Jipeng Yan\*,<sup>a</sup> and Jian Sun\*<sup>a,b</sup>

<sup>a</sup> Key Laboratory of Molecular Medicine and Biotherapy in the Ministry of Industry and Information Technology, School of Life Science, Beijing Institute of Technology, Beijing 100081, P.R. China.

<sup>b</sup> Beijing Engineering Research Center of Cellulose and Its Derivatives, Advanced Research Institute of Multidisciplinary Sciences, Beijing Institute of Technology, Beijing 100081, P.R. China

\* Corresponding authors

E-mail addresses:

jipeng.yan@bit.edu.cn (Jipeng Yan),

jiansun@bit.edu.cn (Jian Sun)

#### Catalogue:

**Fig. S1** FT-IR spectra of [Ch][Lys].

**Fig. S2** HSQC NMR spectra of (a-b) pure [Ch][Lys] and (c-d) *i*-PrOH-recovered-AL.

**Fig. S3** Photos of AL precipitation in *t*-BuOH for the systems with [Ch][Lys] : water ratios (w/w) of 7:3 (a), 5:5 (b), 3:7 (c), and 1:9 (d), respectively.

**Table S1** Elemental analysis of samples of AL and recovered AL.

**Table S2** Integration of H NMR spectra of the flesh and *i*-PrOH-recovered [Ch][Lys].

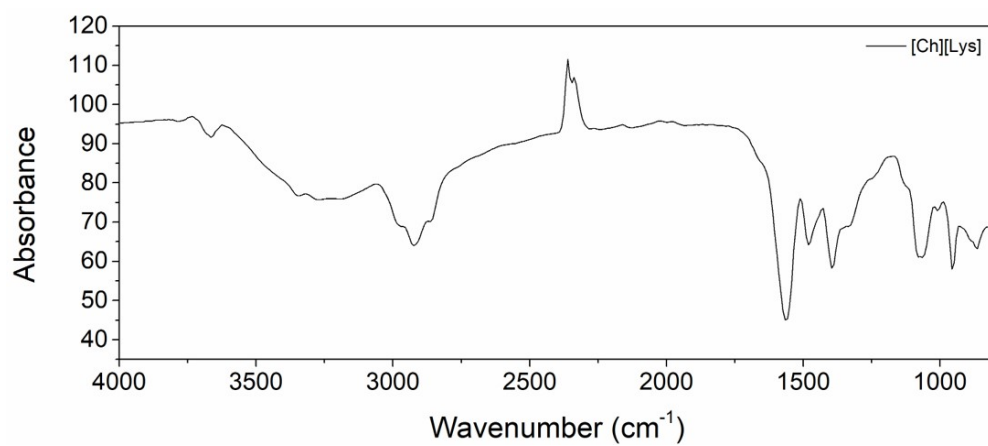

**Fig. S1** FT-IR spectra of [Ch][Lys].

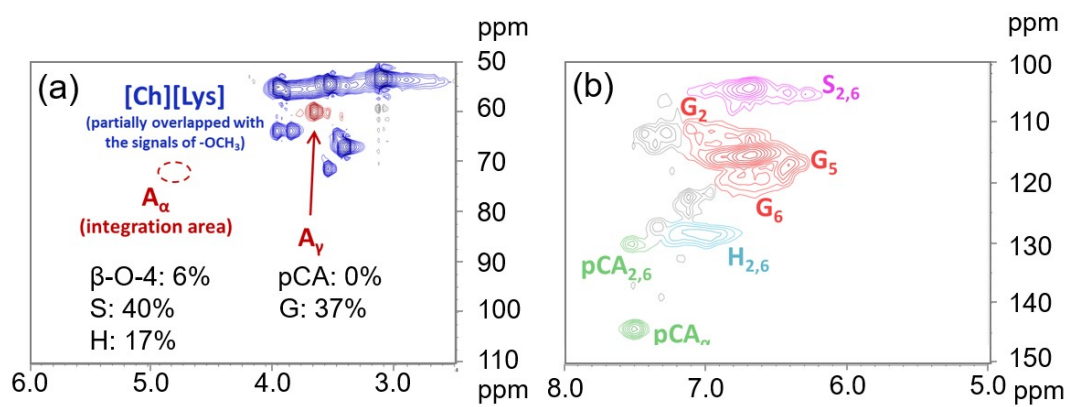

**Fig. S2** HSQC NMR spectra of *i*-PrOH-recovered-AL.

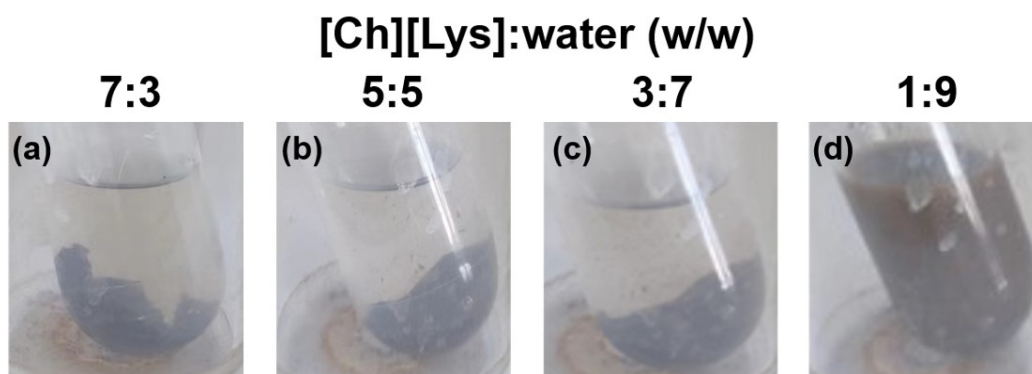

**Fig. S3** Photos of AL precipitation in *t*-BuOH for the systems with [Ch][Lys] : water ratios (w/w) of 7:3 (a), 5:5 (b), 3:7 (c), and 1:9 (d), respectively.

**Table S1** Elemental analysis of samples of AL and recovered AL.

| Samples                     | [Ch][Lys] concentration (wt%) | N(%) | C(%) | H(%) | O(%) |
|-----------------------------|-------------------------------|------|------|------|------|
| AL                          | /                             | 1.0  | 62.5 | 5.4  | 31.1 |
| EtOH-recovered AL           | 100                           | 4.9  | 58.1 | 6.7  | 30.3 |
| <i>i</i> -PrOH-recovered-AL | 100                           | 8.9  | 53.4 | 7.6  | 30.1 |
| <i>t</i> -BuOH-recovered-AL | 100                           | 9.5  | 52.4 | 7.6  | 30.5 |
| <i>t</i> -BuOH-recovered-AL | 70                            | 8.6  | 51.0 | 9.2  | 31.2 |
| <i>t</i> -BuOH-recovered-AL | 50                            | 8.1  | 48.0 | 8.2  | 35.7 |
| <i>t</i> -BuOH-recovered-AL | 30                            | 6.2  | 54.4 | 8.4  | 31.0 |
| <i>t</i> -BuOH-recovered-AL | 10                            | 3.3  | 56.1 | 8.5  | 32.1 |

**Table S2** Integration of <sup>1</sup>H NMR spectra of the flesh and *t*-BuOH-recovered [Ch][Lys]. <sup>a</sup>

| $\delta$ H | Assignment <sup>b</sup>                                    | Flesh [Ch][Lys]<br><sub>c</sub> | <i>t</i> -BuOH-recovered [Ch][Lys] <sup>c</sup> |
|------------|------------------------------------------------------------|---------------------------------|-------------------------------------------------|
| 1.2-1.3    | CH <sub>2</sub>                                            | 2.1                             | 2.1                                             |
| 1.3-1.4    | CH <sub>2</sub>                                            | 2.0                             | 2.0                                             |
| 1.4-1.6    | CH <sub>2</sub>                                            | 2.2                             | 2.1                                             |
| 2.5        | CH <sub>2</sub>                                            | 2.0                             | 2.0                                             |
| 3.1        | CH <sub>3</sub> , CH <sub>3</sub> , CH <sub>3</sub> , CH-N | 9.4                             | 9.5                                             |
| 3.4-3.7    | CH <sub>2</sub>                                            | 2.5                             | 2.4                                             |
| 3.8-4.0    | CH <sub>2</sub>                                            | 1.7                             | 1.8                                             |

- a. The deuterated reagent was DMSO-d<sub>6</sub>, which was also used for abscissa calibration.
- b. According to the reference.<sup>1</sup>
- c. Values were the peak relative intensities of the corresponding signal (the intensity of signal CH<sub>2</sub> at  $\delta$ H = 1.3-1.4 was set as 2.0).

**References:**

1. Q.-P. Liu, X.-D. Hou, N. Li and M.-H. Zong, *Green Chem.*, 2012, **14**, 304-307.
